# Supplementary material for: CD99 Drives Terminal Differentiation of Osteosarcoma Cells by Acting as a Spatial Regulator of ERK 1/2
Source: PubMed Central journal article supplement — J Bone Miner Res. 2013 Nov 6;29(5):1295–309. doi: 10.1002/jbmr.2141 (PMC4255300; doi:10.1002/jbmr.2141), 2013-11-06
Supplement: jbmr0029-1295-sd8.pdf [file jbmr0029-1295-sd8.pdf]

**Supplementary Table 1.** Primer sequences used for qRT-PCR.

| <b>Gene</b>       | <b>Primer</b>                | <b>Primer sequence</b>         |
|-------------------|------------------------------|--------------------------------|
| <b>GAPDH</b>      | sense                        | 5'- GAAGGTGAAGGTCGGAGTC -3'    |
|                   | antisense                    | 5'- GAAGATGGTGATGGGATTTC - 3'  |
|                   | probe                        | 5'- GAAGCTTCCCGTTCTCAGCC - 3'  |
| <b>Collagen 1</b> | sense                        | 5'- TGAAAACATCCCAGCCAAGAA - 3' |
|                   | antisense                    | 5'- AAAGTGGCTGCCAGCATTG - 3'   |
| <b>ALP</b>        | sense                        | 5'- CCTGGAGCTTCAGAAGCTCAA - 3' |
|                   | antisense                    | 5'- ACTGTGGAGACACCCATCCC - 3'  |
| <b>OCN</b>        | sense                        | 5'- GGGCTCCCAGCCATTGAT - 3'    |
|                   | antisense                    | 5'- CAAAGCCTTTGTGTCCAAGCA - 3' |
| <b>Nanog</b>      | sense                        | 5'- ATGCCTCACACGGAGACTGT - 3'  |
|                   | antisense                    | 5'- AAGTGGGTTGTTTGCCTTTG - 3'  |
| <b>Oct3/4</b>     | sense                        | 5'- GGTGGAGAGCAACTCCAATG - 3'  |
|                   | antisense                    | 5'- TCTGCAGAGCTTTGATGTCC - 3'  |
| <b>DMP1</b>       | assay<br>(Life Technologies) | # Hs00189368_m1                |
| <b>MEPE</b>       | assay<br>(Life Technologies) | # Hs00220237_m1                |
